# Supplementary material for: Synthesis of ABB′ and ABC star copolymers via a combination of NMRP and ROP reactions
Source: Royal Society of Chemistry journal article supplement (doi:10.1039/c6py00401f), 2016-01-01
Supplement: c6py00401f1.pdf [file c6py00401f1.pdf]

## Electronic supplementary information (ESI)

### Synthesis of ABB' and ABC star copolymers via a combination of

### NMRP and ROP reaction

Linxiang Hong,<sup>a</sup> Junpo He,<sup>a\*</sup> Yougen Chen,<sup>b,c</sup> Toyoji Kakuchi<sup>b</sup>

<sup>a</sup> State Key Laboratory of Molecular Engineering of Polymers, Department of Macromolecular Science, Fudan University, Shanghai, 200433, China. E-mail: jphe@fudan.edu.cn.

<sup>b</sup> Division of Bio Biotechnology and Macromolecular Chemistry, Graduate School of Chemical Sciences and Engineering, Faculty of Engineering, Hokkaido University, Sapporo 060-8628, Japan. E-mail: kakuchi@poly-bm.eng.hokudai.ac.jp.

<sup>c</sup> Institute for Advanced Study, Shenzhen University, Nanshan District, Shenzhen, Guangdong, 518060, China. E-mail: chenylg@szu.edu.cn.

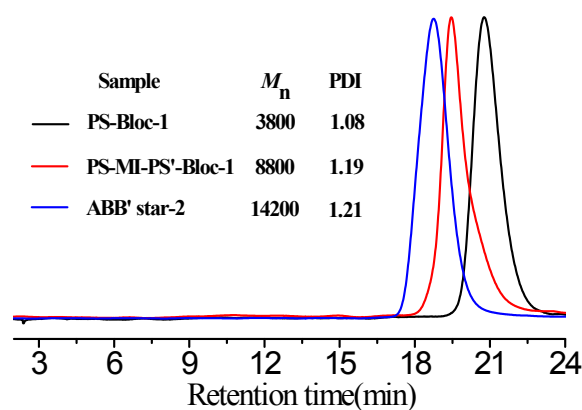

Figure S1. GPC traces of PS-Bloc-1, PS-MI-PS'-Bloc-1 and ABB' star-2.

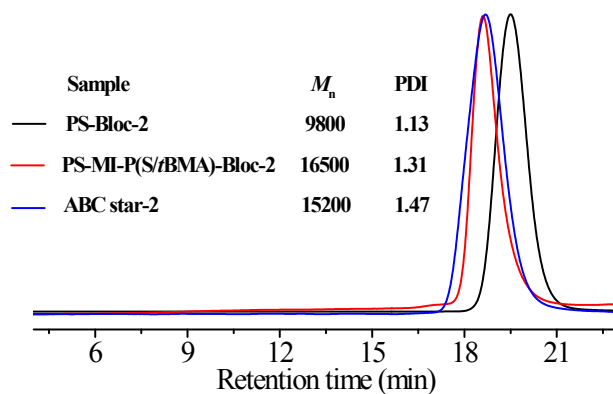

Figure S2. GPC traces of PS-Bloc-2, PS-MI-PS'-Bloc-2 and ABC star-2.

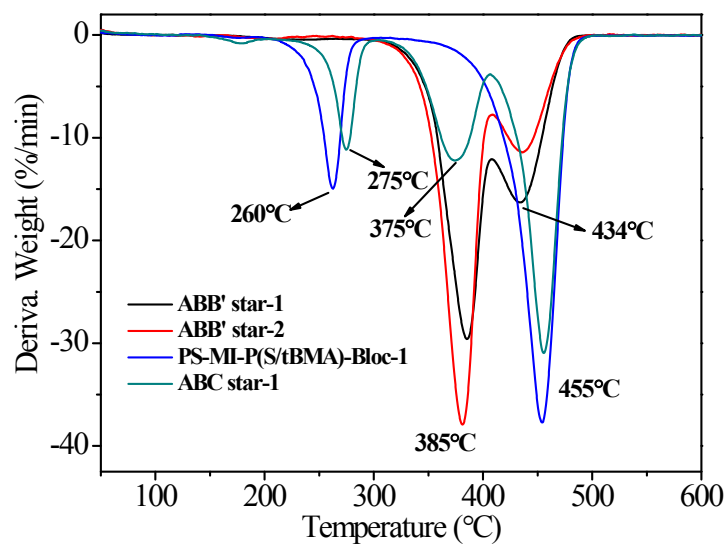

**Figure S3.** DTG traces of PS-MI-P(S/tBMA)-Bloc-1, ABB' star-1, ABB' star-2 and ABC star-1.

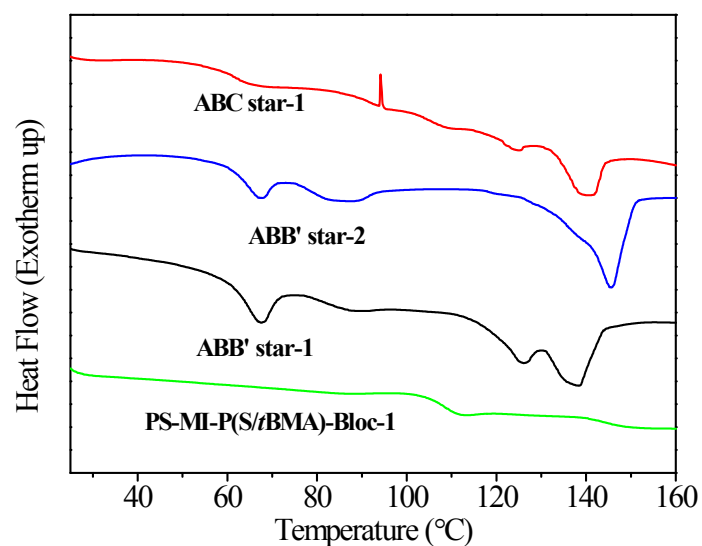

**Figure S4.** DSC curves of PS-MI-P(S/tBMA)-Bloc-1, ABB' star-1, ABB' star-2 and ABC star-1 (first heating process).

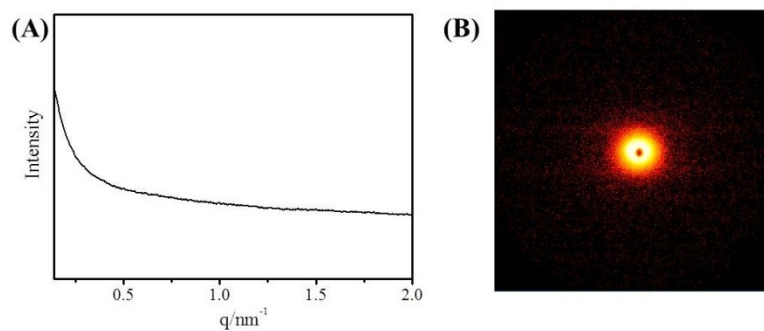

**Figure S5.** (A) 1D SAXS and (B) 2D SAXS profiles of ABB' star-1.
